# Supplementary material for: Clinical significance of the expression of autophagy-associated marker, beclin 1, in breast cancer patients who received neoadjuvant endocrine therapy
Source: BMC Cancer. 2016 Mar 16;16:230. doi: 10.1186/s12885-016-2270-9 (PMC4794811; doi:10.1186/s12885-016-2270-9)
Supplement: Additional file 1: Table S1. — All the data supporting the conclusion in this paper. (XLS 48 kb) [file 12885_2016_2270_MOESM1_ESM.xls]

## Sheet: data 20140507 Dr. Sugimoto
					Local assessment			Central assessment							cancer		stroma		cancer		stroma		cancer		stroma		cancer
age range	T	N	M	stage	ER pre	PgR pre	HER2 pre	ER pre	PR pre	ER post	PR post	preKi67 (hot spot)	postKi67	pre Ki67 (overall average)	Beclin pre	Beclin post	Beclin pre	Beclin post	LC3 pre	LC3 post	LC3 pre	LC3 post	TUNEL pre	TUNEL post	TUNEL pre	TUNEL post	M30 pre	M30 post	clinical response	patho response
61-70	2	0	0	ⅡA	+	+	-	8	7	6	0	5	1	3	0	0	0	0					20		50		5	0	R	PR
61-70	2	0	0	ⅡA	+	+	-	7	6	7	5	3	2	1	0	0	0	0	0		0		5	1	10			0	R	NR
61-70	2	0	0	ⅡA	+	+	-	6	5	6	2	19	8	12	0	0	0	0	0	80	0	50	0	0	0	0			NR	NR
55-60	2	0	0	ⅡA	+	+	-	8	7	8	4	2	1	1	0		0		0	5	0	0	0	0	0	0			R	PR
61-70	2	1	0	ⅡB	+	+	-			7	5		11			0		0						0		0		2	NR
71-80	2	0	0	ⅡA	+	+	-	8	4	8	0	28	25	20	0	0	0	20	0	0	5	20	0	10	0	50			NR	PR
61-70	2	0	0	ⅡA	+	+	-	8	7	8	7	22	19	14	0	0	0	0	0	0	0	20	0	0	0	0		0	R	PR
61-70	2	0	0	ⅡA	+	+	-	5	4			57		48	0		0		0		0		0		0		0
55-60	2	0	0	ⅡA	+	+	-	8	6	8	7	1	1	1	0	5	0	5	0	5	0	5	0	10	0	0		5	NR	PR
71-	2	0	0	ⅡA	+	+	-	8	8	8	7	8	2	5	0	0	0	0	0	0	0	20	20	0	0	0	5	1	R	NR
61-70	2	0	0	ⅡA	+	+	-	8	6	8	4	6	1	1						20		20						2	NR	PR
61-70	2	0	0	ⅡA	+	+	-	8	7	7	0	8	2	3	0	0	0	0					5	0	10	5	3	0	NR	NR
61-70	2	0	0	ⅡA	+	-	-	6	0	8	2	7	1	2	0	0	0	0	0	5	5	0	0	0	0	0	5	0	R	PR
61-70	2	0	0	ⅡA	+	+	-	6	6	7	0	7	4	6	0	0	0	5	2	5	0	0	0	10	0	10	0	5	R	PR
61-70	2	0	0	ⅡA	+	+	-	7	7	8	5	32	9	29	0	0	0	0	0	5	1	10	5	5	0	5	5	5	NR	PR
71-	2	0	0	ⅡA	+	+	-	8	7	8	7	18	10	18	0	0	0	0					0	0	0	50	0	0	NR	NR
71-	2	1	0	ⅡB	+	+	-	8	8			43		31	0		0		0		0		50		50		0		R
61-70	2	0	0	ⅡA	+	+	-	8	7			8		5	0		0		1		1		1		0		0
71-	2	1	0	ⅡB	+	+	-	7	7	8	5	22	16	22	0	0	2	2					0	0	0	0	1	5	NR	NR
61-70	2	0	0	ⅡA	+	+	-	8	7	8	4	38	27	34	0	5	5	10					0	0	0	0	5	5	R	NR
71-	2	1	0	ⅡB	+	+	-	8	7	8	0	17	2	16	0	3	5	10					100	2	100	0	1	1	NR	NR
55-60	2	0	0	ⅡA	+	+	-	8	8	7	5	6	3	2	0	0	0	2	1	5	1	0	20	0	0	5	5	1	NR	PR
61-70	2	0	0	ⅡA	+	+	-	8	8	8	8	6	7	6	0	3	3	10	0	0	10	5	0	1	0	0	2	0	R	NR
61-70	2	0	0	ⅡA	+	+	-	8	8	7	5	3	1	1	0	5	0	30					0	0	0	0	5	0	R	PR
61-70	2	0	0	ⅡA	+	+	-	8	7	6	0	47	0	45	0	0	2	20		20		0	0	0	0	0	1	0	NR	NR
61-70	2	0	0	ⅡA	+	+	-	8	7	8	5	4	2	4	0	0	0	0	0	0	0	0	10	0	50	0	10	0	R
61-70	2	0	0	ⅡA	+	+	-	8	7	8	0	7	3	7	0	5	0	0					0	0	0	20	5	1	R	NR
55-60	2	1	0	ⅡB	+	-	-	8	0	6	5	11	6	10		0		2		0		0	0	0	0	0		5	R	NR
61-70	2	0	0	ⅡA	+	+	-	7	7	8	4	37	12	31	0	0	0	2	0	5	20	5	0	0	0	0	5	5	R	NR
71-	2	1	0	ⅡB	+	+	-	8	6	8	0	26	19	19		0		0		0		0		0		50		5	R	PR
61-70	2	0	0	ⅡA	+	+	-	8	7	8	6	4	1	2	0	0	0	20	0	2	20	5	0	0	0	0	5	2	R	NR
71-	2	1	0	ⅡB	+	+	-	6	3	8	0	7	5	2		0		10		0		0		0		0		0	R	NR
61-70	2	1	0	ⅡB	+	+	-	8	8	8	7	12	15	10	0	0	0	10	0	5	2	5	0	1	1	10	1	1	R	NR
61-70	2	0	0	ⅡA	+	+	-	8	8	7	7	6	1	3	0	0	0	10	0	2	0	2	0	0	0	10	1	0	NR	NR
61-70	2	0	0	ⅡA	+	+	-	8	4	8	0	13	4	13	0	0	5	0	2	2	2	2	0	0	0	1	1	1	NR	NR
61-70	2	0	0	ⅡA	+	+	-	8	5	6	0	10		5					2	2	0	2	0	0	0	0	0	0	NR	NR
71-	2	0	0	ⅡA	+	-	-	6	0	8	0	2	3	0						0		0		0		0		0	NR	NR
55-60	2	1	0	ⅡB	+	+	-	8	6	7	6	23	0	20	0	0	0	5					0	0	5	0	1	0	R	PR
55-60	2	0	0	ⅡA	+	-	-	4	0	4	0	27	11	26	0	0	2	2	0	2	0	0	0	0	0	0	1	1	NR	NR
61-70	2	0	0	ⅡA	+	+	-			8	8		8			0		5		0		5		0		1			R
71-	2	0	0	ⅡA	+	+	-	8	7	8	5	6	3	4	0	0	0	30	0	0	0	20	1	0	5	50	0	1
71-	2	0	0	ⅡA	+	+	-	8	8	7	3	6	2	5	0	0	0	0					0	0	0	0	1	0	NR	NR
71-	2	0	0	ⅡA	+	+	-	8	7	8	7	38	2	31	0	10	0	5	0	1	0	0	0	0	0	0	5	2	R	NR
71-	2	0	0	ⅡA	+	+	-	8	7	8	6		1			0		5		0		0		20		50		1	NR	NR
61-70	2	0	0	ⅡA	+	+	-	8	6	8	5	6	5	5	0	0	0	10		10		0	0	0	0	5		0	NR	NR
61-70	2	1	0	ⅡB	+	+	-	8	5	5	0	16	7	13		0		5		0		0		0		0	5	2	R
61-70	2	1	0	ⅡB	+	-	-	8	0	8	0	47	2	43						0		0		50		10		5	R	NR
55-60	2	0	0	ⅡA	+	+	-	7	5	8	7	12	3	4	0	0	0	2	0	10	0	0	0	0	0	0	1	1	NR	NR
71-	2	1	0	ⅡB	+	+	-	8	8	8	0	10	0	8	0	0	0	30	0	0	0	0	0	10	0	10	0	0	R	PR
61-70	2	1	0	ⅡB	+	+	-	8	7	8	6	6	4	4	0	0	0	0	0	0	0	0	0	0	10	10	0	0	R	NR
55-60	2	0	0	ⅡA	+	+	-	6	6	7	5	1	3	0	0	0	0	3		0		0	0	0	10	10		0	R	NR
71-	2	0	0	ⅡA	+	+	-			8	6		1			0		5					0	0	0	1	0	0	R	PR
55-60	2	1	0	ⅡB	+	+	-	8	7	8	4	31	2	30	0	0	10	20					1	0	10	0	1	0	NR	NR
61-70	2	0	0	ⅡA	+	+	-	6	6	8	4	8	3	5	0	0	0	10	0	0	0	5	0	50	0	50	10	0	R	PR
61-70	2	0	0	ⅡA	+	+	-	7	6	7	4	1	1	0	0	0	0	5	0	0	0	0	0	50	5	50	20	0	R	NR
55-60	2	0	0	ⅡA	+	+	-	7	5	6	0				0		0		2	0	0	5					1	1	R	PR
55-60	2	0	0	ⅡA	+	+	-	8	6	8	6	3	1	2	0	0	0	5	2	2	0	5	0	0	0	0	0	0	NR	NR
55-60	2	1	0	ⅡB	+	+	-	8	7	8	0	14	20	13	0	0	5	0	0	2	2	10	0	0	0	5	1	1	NR	NR
61-70	2	1	0	ⅡB	+	-	-	8	0	8	0	19	1	15		0		5		0		5		0		10		5	R	NR
55-60	2	0	0	ⅡA	+	+	-	8	7	8	5	15	5	9	0	0	0	5	0	2	0	0	0	0	0	0	1	0	R	PR
71-	2	0	0	ⅡA	+	+	-	8	8	8	4	7	1	7	0	0	2	0	0		0		0	0	10	0	1	0	R	NR
61-70	2	1	0	ⅡB	+	+	-	8	7	8	5	45	29	38	0	0	0	2					0	0	0	5	5	20	R	NR
55-60	2	0	0	ⅡA	+	+	-	8	4	8	4	2	1	2	0	0	0	2		0		2	0	5	0	10		30	R	NR
55-60	2	0	0	ⅡA	+	+	-	8	8	7	5		0						0	0	0	50	20	0	80	0	0	0	NR	PR
55-60	2	0	0	ⅡA	+	+	-	7	8	8	5	3	0	2	0	0	2	0	0	5	2	0	0	5	2	0	10	1	NR	NR
55-60	2	0	0	ⅡA	+	+	-	5	5	8	6	2		1	0	0	0	0		0		10		0		0	0	5	R	NR
61-70	2	0	0	ⅡA	+	+	-	7	4	7	4	7	1	7									0	50	0	10	0	0	R	PR
55-60	2	0	0	ⅡA	+	+	-	7	7	8	0	4	8	3	0	0	0	0		2		0	0	5	0	0	0	1	NR	NR
61-70	2	1	0	ⅡB	+	+	-			8	0		2											10		10		5	NR
61-70	2	0	0	ⅡA	+	+	-	6	5	6	0	18	12	13	0	0	1	0	0	0	0	0	0	0	0	0	5	1	NR	NR
	Clinical response, R: responder NR: non responder; Pathological response, PR: responder NR: non responder
